# Supplementary material for: Theoretical design of SnS2–graphene heterojunctions with vacancy and impurity defects for multi-purpose photoelectric devices
Source: Royal Society of Chemistry journal article supplement (doi:10.1039/d1cp04552k), 2021-12-02
Supplement: d1cp04552k1.pdf [file d1cp04552k1.pdf]

**Supplementary material**

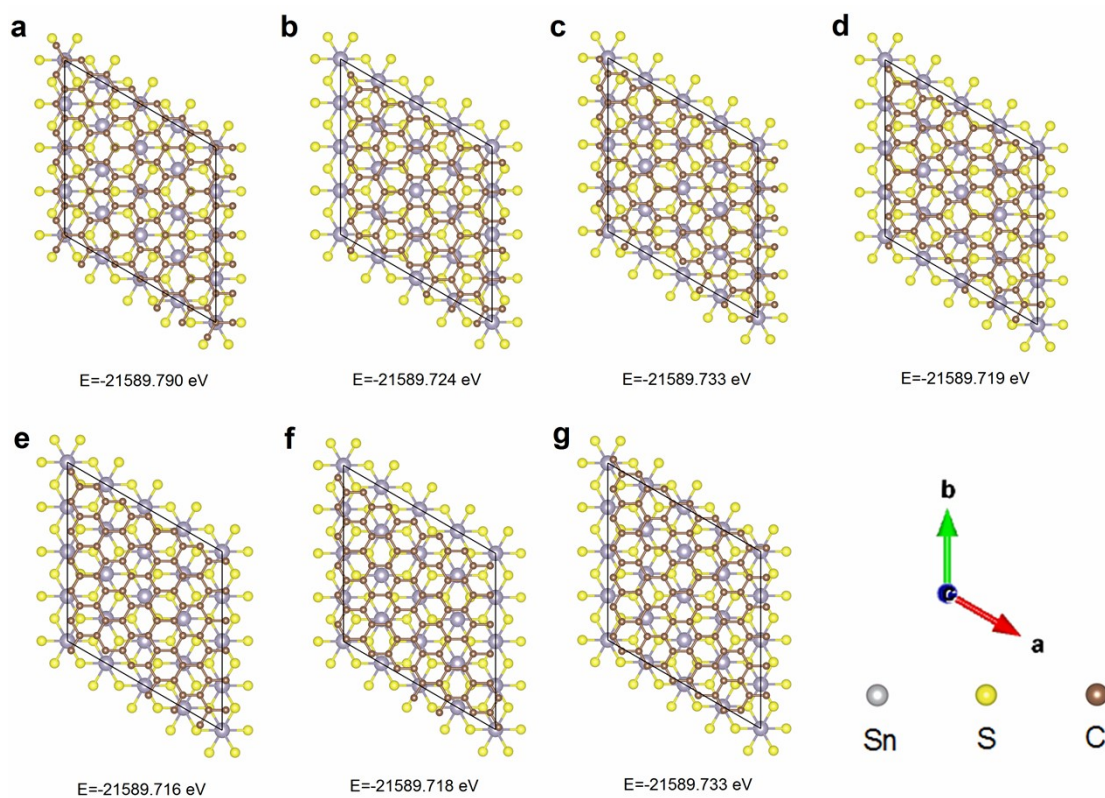

**Fig. S1** Seven different initial relaxation positions of SnS<sub>2</sub>/G heterojunction system.

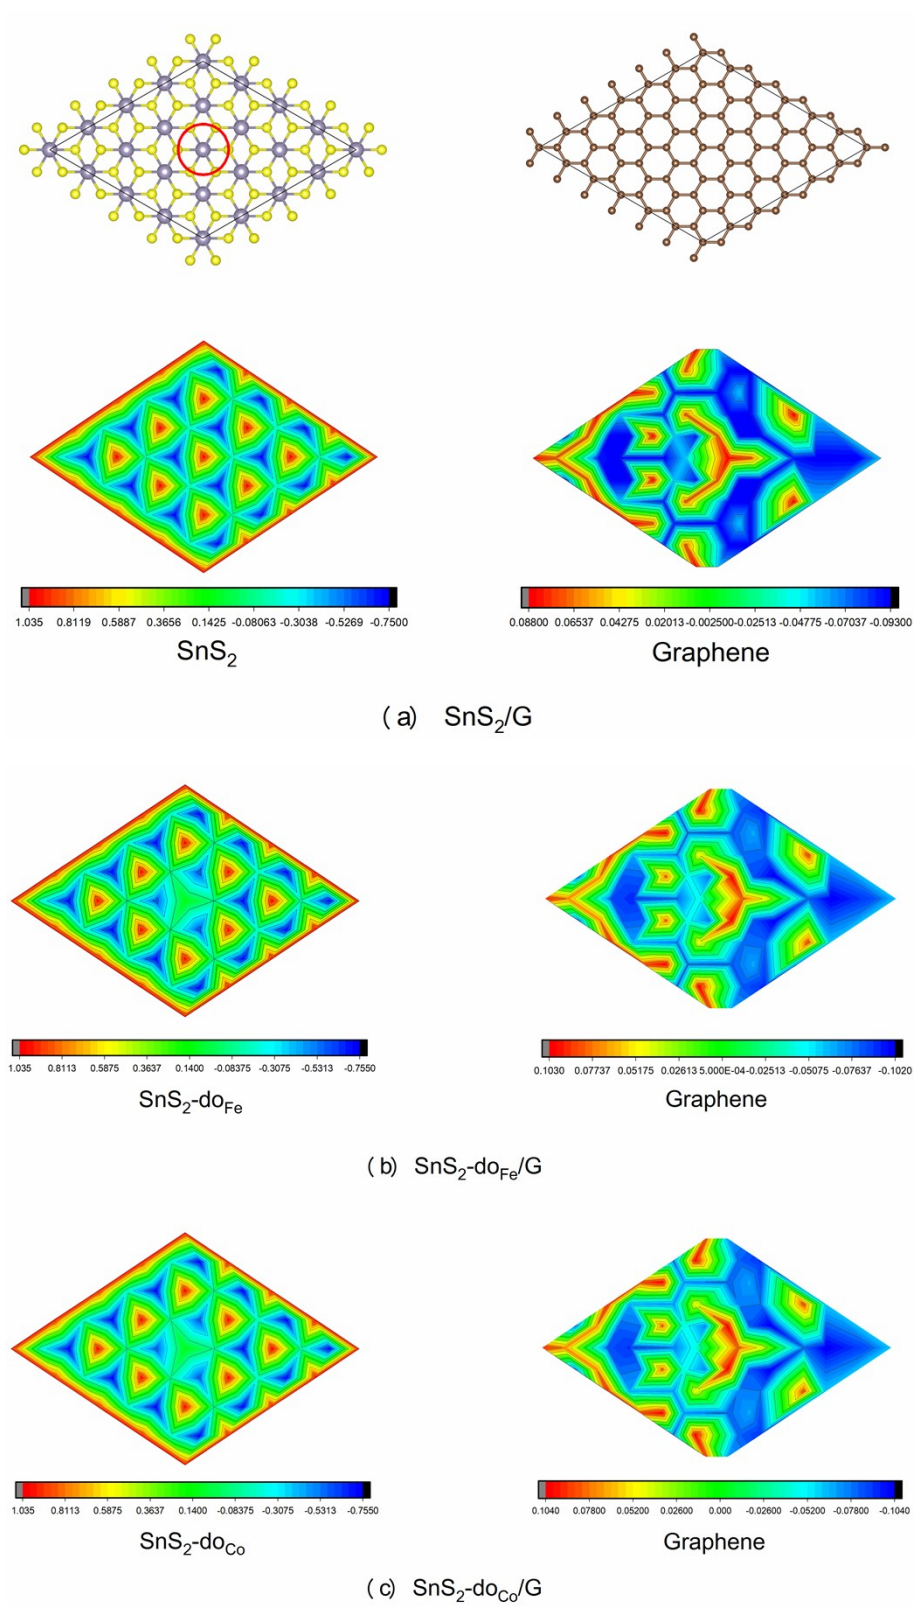

**Fig. S2** Charge distribution of intrinsic  $\text{SnS}_2/\text{G}$  and  $\text{Fe}^{3+}/\text{Co}^{3+}$  doped  $\text{SnS}_2/\text{G}$ . In the figure, the  $\text{SnS}_2$  and graphene counterparts are displayed separately.

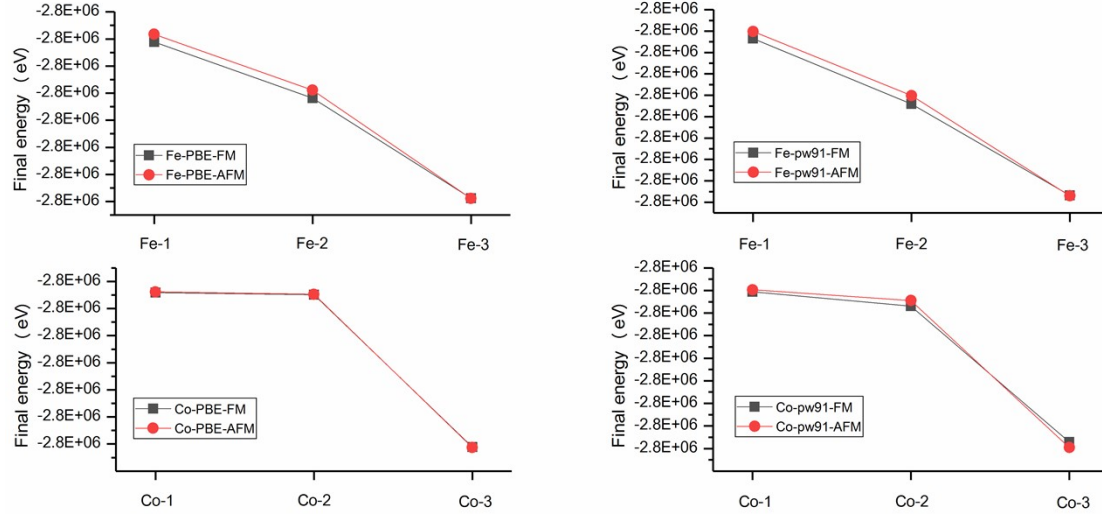

**Fig. S3** Final energy of the three doping positions in Figure 9.

**Table S1** Mulliken atomic charge of  $\text{SnS}_2/\text{G}$ ,  $\text{SnS}_2\text{-do}_{\text{Fe}}/\text{G}$  and  $\text{SnS}_2\text{-do}_{\text{Co}}/\text{G}$ .

| $\text{SnS}_2/\text{G}$ |        | $\text{SnS}_2\text{-do}_{\text{Fe}}/\text{G}$ |        | $\text{SnS}_2\text{-do}_{\text{Co}}/\text{G}$ |        |
|-------------------------|--------|-----------------------------------------------|--------|-----------------------------------------------|--------|
|                         | charge |                                               | charge |                                               | charge |
| S(1)                    | -0.745 | S(1)                                          | -0.751 | S(1)                                          | -0.751 |
| S(2)                    | -0.173 | S(2)                                          | -0.185 | S(2)                                          | -0.186 |
| Sn(3)                   | 1.025  | Sn(3)                                         | 1.012  | Sn(3)                                         | 1.011  |
| S(4)                    | -0.745 | S(4)                                          | -0.751 | S(4)                                          | -0.751 |
| S(5)                    | -0.121 | S(5)                                          | -0.086 | S(5)                                          | -0.081 |
| Sn(6)                   | 1.033  | Sn(6)                                         | 1.016  | Sn(6)                                         | 1.016  |
| S(7)                    | -0.745 | S(7)                                          | -0.746 | S(7)                                          | -0.747 |
| S(8)                    | -0.173 | S(8)                                          | -0.185 | S(8)                                          | -0.186 |
| Sn(9)                   | 1.025  | Sn(9)                                         | 1.012  | Sn(9)                                         | 1.011  |
| S(10)                   | -0.745 | S(10)                                         | -0.746 | S(10)                                         | -0.747 |
| S(11)                   | -0.121 | S(11)                                         | -0.123 | S(11)                                         | -0.124 |
| Sn(12)                  | 1.033  | Sn(12)                                        | 1.033  | Sn(12)                                        | 1.034  |
| S(13)                   | -0.746 | S(13)                                         | -0.748 | S(13)                                         | -0.748 |
| S(14)                   | -0.173 | S(14)                                         | -0.185 | S(14)                                         | -0.186 |
| Sn(15)                  | 1.033  | Sn(15)                                        | 1.033  | Sn(15)                                        | 1.034  |
| S(16)                   | -0.745 | S(16)                                         | -0.593 | S(16)                                         | -0.586 |
| S(17)                   | -0.173 | S(17)                                         | -0.083 | S(17)                                         | -0.093 |
| Sn(18)                  | 1.033  | Sn(18)                                        | 1.017  | Sn(18)                                        | 1.016  |
| S(19)                   | -0.746 | S(19)                                         | -0.748 | S(19)                                         | -0.748 |
| S(20)                   | -0.173 | S(20)                                         | -0.083 | S(20)                                         | -0.093 |
| Sn(21)                  | 1.033  | Sn(21)                                        | 1.017  | Sn(21)                                        | 1.016  |
| S(22)                   | -0.745 | S(22)                                         | -0.746 | S(22)                                         | -0.747 |
| S(23)                   | -0.173 | S(23)                                         | -0.185 | S(23)                                         | -0.186 |
| Sn(24)                  | 1.033  | Sn(24)                                        | 1.033  | Sn(24)                                        | 1.034  |
| S(25)                   | -0.745 | S(25)                                         | -0.751 | S(25)                                         | -0.751 |
| S(26)                   | -0.173 | S(26)                                         | -0.17  | S(26)                                         | -0.168 |

---

|        |        |        |        |        |        |
|--------|--------|--------|--------|--------|--------|
| Sn(27) | 1.025  | Sn(27) | 1.012  | Sn(27) | 1.011  |
| S(28)  | -0.745 | S(28)  | -0.593 | S(28)  | -0.586 |
| S(29)  | -0.121 | S(29)  | -0.086 | S(29)  | -0.081 |
| Sn(30) | 1.033  | Sn(30) | 1.017  | Sn(30) | 1.016  |
| S(31)  | -0.745 | S(31)  | -0.593 | S(31)  | -0.586 |
| S(32)  | -0.173 | S(32)  | -0.083 | S(32)  | -0.093 |
| Sn(33) | 1.025  | Fe(33) | 0.13   | Co(33) | 0.119  |
| S(34)  | -0.745 | S(34)  | -0.751 | S(34)  | -0.751 |
| S(35)  | -0.121 | S(35)  | -0.086 | S(35)  | -0.081 |
| Sn(36) | 1.033  | Sn(36) | 1.017  | Sn(36) | 1.016  |
| S(37)  | -0.746 | S(37)  | -0.746 | S(37)  | -0.745 |
| S(38)  | -0.173 | S(38)  | -0.17  | S(38)  | -0.168 |
| Sn(39) | 1.033  | Sn(39) | 1.016  | Sn(39) | 1.016  |
| S(40)  | -0.745 | S(40)  | -0.751 | S(40)  | -0.751 |
| S(41)  | -0.173 | S(41)  | -0.17  | S(41)  | -0.168 |
| Sn(42) | 1.033  | Sn(42) | 1.016  | Sn(42) | 1.016  |
| S(43)  | -0.746 | S(43)  | -0.748 | S(43)  | -0.748 |
| S(44)  | -0.173 | S(44)  | -0.185 | S(44)  | -0.186 |
| Sn(45) | 1.033  | Sn(45) | 1.017  | Sn(45) | 1.016  |
| S(46)  | -0.745 | S(46)  | -0.751 | S(46)  | -0.751 |
| S(47)  | -0.173 | S(47)  | -0.185 | S(47)  | -0.186 |
| Sn(48) | 1.033  | Sn(48) | 1.017  | Sn(48) | 1.016  |
| C(49)  | 0.088  | C(49)  | 0.088  | C(49)  | 0.087  |
| C(50)  | -0.056 | C(50)  | -0.066 | C(50)  | -0.068 |
| C(51)  | -0.092 | C(51)  | -0.082 | C(51)  | -0.081 |
| C(52)  | -0.093 | C(52)  | -0.092 | C(52)  | -0.092 |
| C(53)  | -0.092 | C(53)  | -0.082 | C(53)  | -0.081 |
| C(54)  | -0.056 | C(54)  | -0.066 | C(54)  | -0.068 |
| C(55)  | 0.088  | C(55)  | 0.088  | C(55)  | 0.087  |
| C(56)  | -0.056 | C(56)  | -0.06  | C(56)  | -0.06  |
| C(57)  | -0.092 | C(57)  | -0.084 | C(57)  | -0.084 |
| C(58)  | -0.093 | C(58)  | -0.102 | C(58)  | -0.104 |
| C(59)  | -0.092 | C(59)  | -0.084 | C(59)  | -0.084 |
| C(60)  | -0.056 | C(60)  | -0.06  | C(60)  | -0.06  |
| C(61)  | -0.087 | C(61)  | -0.08  | C(61)  | -0.08  |
| C(62)  | 0.072  | C(62)  | 0.103  | C(62)  | 0.104  |
| C(63)  | -0.087 | C(63)  | -0.077 | C(63)  | -0.074 |
| C(64)  | -0.093 | C(64)  | -0.08  | C(64)  | -0.078 |
| C(65)  | -0.092 | C(65)  | -0.078 | C(65)  | -0.077 |
| C(66)  | -0.093 | C(66)  | -0.08  | C(66)  | -0.078 |
| C(67)  | -0.087 | C(67)  | -0.077 | C(67)  | -0.074 |
| C(68)  | 0.072  | C(68)  | 0.103  | C(68)  | 0.104  |
| C(69)  | -0.087 | C(69)  | -0.08  | C(69)  | -0.08  |
| C(70)  | -0.093 | C(70)  | -0.102 | C(70)  | -0.104 |

---

---

|        |        |        |        |        |        |
|--------|--------|--------|--------|--------|--------|
| C(71)  | -0.092 | C(71)  | -0.084 | C(71)  | -0.084 |
| C(72)  | -0.093 | C(72)  | -0.102 | C(72)  | -0.104 |
| C(73)  | 0.088  | C(73)  | 0.088  | C(73)  | 0.087  |
| C(74)  | 0.072  | C(74)  | 0.103  | C(74)  | 0.104  |
| C(75)  | -0.087 | C(75)  | -0.077 | C(75)  | -0.074 |
| C(76)  | 0.072  | C(76)  | 0.049  | C(76)  | 0.046  |
| C(77)  | 0.088  | C(77)  | 0.082  | C(77)  | 0.083  |
| C(78)  | -0.056 | C(78)  | -0.046 | C(78)  | -0.046 |
| C(79)  | 0.088  | C(79)  | 0.082  | C(79)  | 0.083  |
| C(80)  | 0.072  | C(80)  | 0.049  | C(80)  | 0.046  |
| C(81)  | -0.087 | C(81)  | -0.077 | C(81)  | -0.074 |
| C(82)  | 0.072  | C(82)  | 0.103  | C(82)  | 0.104  |
| C(83)  | 0.088  | C(83)  | 0.088  | C(83)  | 0.087  |
| C(84)  | -0.056 | C(84)  | -0.06  | C(84)  | -0.06  |
| C(85)  | 0.088  | C(85)  | 0.096  | C(85)  | 0.096  |
| C(86)  | -0.056 | C(86)  | -0.066 | C(86)  | -0.068 |
| C( 87) | -0.092 | C(87)  | -0.082 | C(87)  | -0.081 |
| C(88)  | -0.093 | C(88)  | -0.08  | C(88)  | -0.078 |
| C(89)  | -0.092 | C(89)  | -0.078 | C(89)  | -0.077 |
| C(90)  | -0.056 | C(90)  | -0.046 | C(90)  | -0.046 |
| C(91)  | 0.088  | C(91)  | 0.082  | C(91)  | 0.083  |
| C(92)  | -0.056 | C(92)  | -0.046 | C(92)  | -0.046 |
| C(93)  | -0.092 | C(93)  | -0.078 | C(93)  | -0.077 |
| C(94)  | -0.093 | C(94)  | -0.08  | C(94)  | -0.078 |
| C(95)  | -0.092 | C(95)  | -0.082 | C(95)  | -0.081 |
| C(96)  | -0.056 | C(96)  | -0.066 | C(96)  | -0.068 |
| C(97)  | -0.087 | C(97)  | -0.085 | C(97)  | -0.085 |
| C(98)  | 0.072  | C(98)  | 0.076  | C(98)  | 0.076  |
| C(99)  | -0.087 | C(99)  | -0.085 | C(99)  | -0.085 |
| C(100) | -0.093 | C(100) | -0.092 | C(100) | -0.092 |
| C(101) | -0.092 | C(101) | -0.082 | C(101) | -0.081 |
| C(102) | -0.093 | C(102) | -0.08  | C(102) | -0.078 |
| C(103) | -0.087 | C(103) | -0.077 | C(103) | -0.074 |
| C(104) | 0.072  | C(104) | 0.049  | C(104) | 0.046  |
| C(105) | -0.087 | C(105) | -0.077 | C(105) | -0.074 |
| C(106) | -0.093 | C(106) | -0.08  | C(106) | -0.078 |
| C(107) | -0.092 | C(107) | -0.082 | C(107) | -0.081 |
| C(108) | -0.093 | C(108) | -0.092 | C(108) | -0.092 |
| C(109) | 0.088  | C(109) | 0.096  | C(109) | 0.096  |
| C(110) | 0.072  | C(110) | 0.076  | C(110) | 0.076  |
| C(111) | -0.087 | C(111) | -0.085 | C(111) | -0.085 |
| C(112) | 0.072  | C(112) | 0.076  | C(112) | 0.076  |
| C(113) | 0.088  | C(113) | 0.096  | C(113) | 0.096  |
| C(114) | -0.056 | C(114) | -0.066 | C(114) | -0.068 |

---

---

|        |        |        |        |        |        |
|--------|--------|--------|--------|--------|--------|
| C(115) | 0.088  | C(115) | 0.088  | C(115) | 0.087  |
| C(116) | 0.072  | C(116) | 0.103  | C(116) | 0.104  |
| C(117) | -0.087 | C(117) | -0.08  | C(117) | -0.08  |
| C(118) | 0.072  | C(118) | 0.103  | C(118) | 0.104  |
| C(119) | 0.088  | C(119) | 0.088  | C(119) | 0.087  |
| C(120) | -0.056 | C(120) | -0.066 | C(120) | -0.068 |

---
